# Supplementary material for: Transferrin conjugated nontoxic carbon dots for doxorubicin delivery to target pediatric brain tumor cells
Source: Royal Society of Chemistry journal article supplement (doi:10.1039/c6nr05055g), 2016-01-01
Supplement: c6nr05055g1.pdf [file c6nr05055g1.pdf]

## Supporting Information:

### Transferrin Conjugated Nontoxic Carbon Dots for Doxorubicin Delivery to Target Pediatric Brain Tumor Cells

*Shanghao Li<sup>1,§</sup>, Daniel Amat<sup>1,§</sup>, Zhili Peng<sup>1</sup>, Steven Vanni<sup>2</sup>, Scott Raskin<sup>3</sup>, Guillermo De Angulo<sup>3</sup>, Abdelhameed M. Othman,<sup>4,5,\*</sup> Regina M. Graham<sup>2</sup>, and Roger M. Leblanc<sup>1,\*</sup>*

<sup>1</sup>Department of Chemistry, University of Miami, 1301 Memorial Drive, Coral Gables, Florida, 33146, United States

<sup>2</sup>Department of Neurological Surgery, Miller School of Medicine, University of Miami, Miami, Florida, 33136, United States

<sup>3</sup>Nicklaus Children's Hospital, Miami, Florida, 33155, United States

<sup>4</sup>Department of Chemistry, Faculty of Science in Yanbu, Taibah University, Yanbu, Saudi Arabia

<sup>5</sup>Department of Environmental Biotechnology, Genetic Engineering and Biotechnology, University of Sadat City, Sadat City, Egypt

<sup>§</sup>These two authors contribute equally.

\*Corresponding authors R.M.L. Tel.: +1-305-284-2194; Fax: +1-305-284-6367. E-mail: [rml@miami.edu](mailto:rml@miami.edu). A.M.O. Tel.: +966-560-251-254. E-mail: [hameed.mahmoud61@hotmail.com](mailto:hameed.mahmoud61@hotmail.com).

**Keywords:** Anti-Cancer; Carbon Dots; Doxorubicin; Drug Delivery; Pediatric Brain Tumors; Transferrin

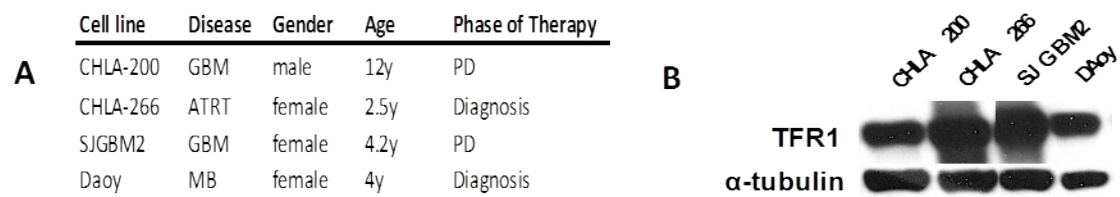

**Figure SI-1.** Pediatric Brain Tumor Cell lines. Characteristics of cell lines used in this study (A), and Western blot analysis of TFR1 levels in multiple pediatric brain tumor cell lines (B). CHLA-259 (Medulloblastoma) CHLA-266sp refers to the stem-like cell population, GBM-glioblastoma, ATRT-Atypical teratoid/rhabdoid tumor, PD-progressive disease.
